# Supplementary material for: One-Pot Preparation of Imidazole-Ring-Modified Graphitic Carbon Nitride Nanozymes for Colorimetric Glucose Detection
Source: MDPI journal article supplement (doi:10.3390/bios12110930), 2022-10-27
Supplement: s1 [file s1]

## Supplementary Materials

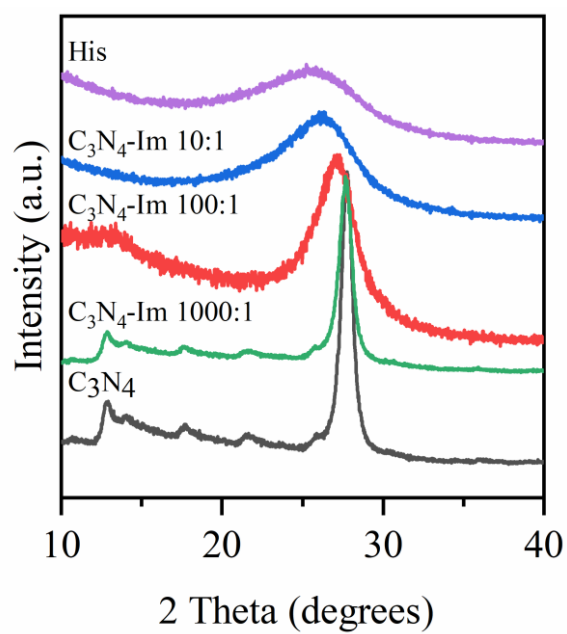

**Figure S1.** XRD pattern of histidine, g-C<sub>3</sub>N<sub>4</sub>, and g-C<sub>3</sub>N<sub>4</sub>-Im of different mass ratios between urea and histidine (10:1; 100:1; 1000:1) after calcination.

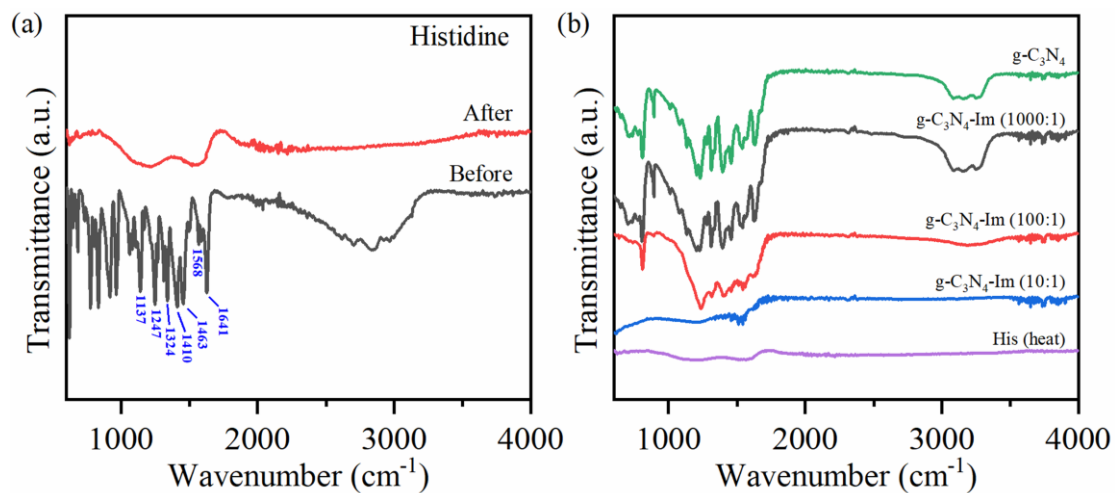

**Figure S2.** a) FTIR spectra of g-C<sub>3</sub>N<sub>4</sub> before and after calcination; b) FTIR spectra of histidine and g-C<sub>3</sub>N<sub>4</sub>-Im of different mass ratios between urea and histidine (10:1; 100:1; 1000:1) after calcination.

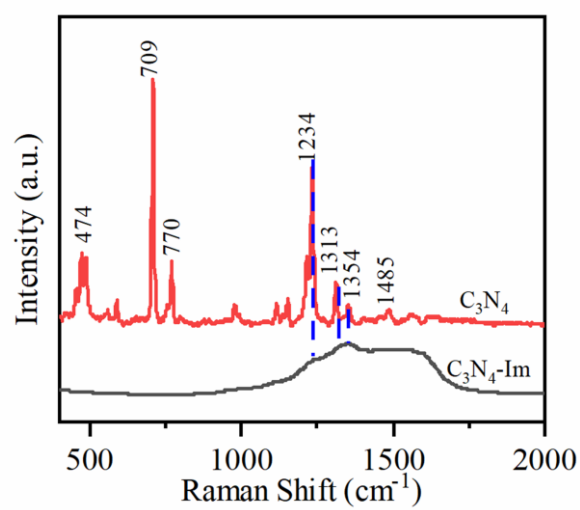

**Figure S3.** Raman spectra of heating the g- $\text{C}_3\text{N}_4$  and the g- $\text{C}_3\text{N}_4\text{-Im}$ .

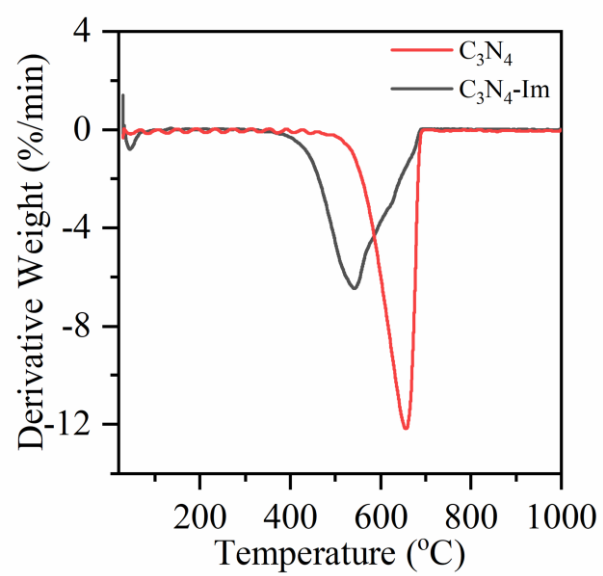

**Figure S4.** DTG curve of g- $C_3N_4$  and g- $C_3N_4$ -Im.

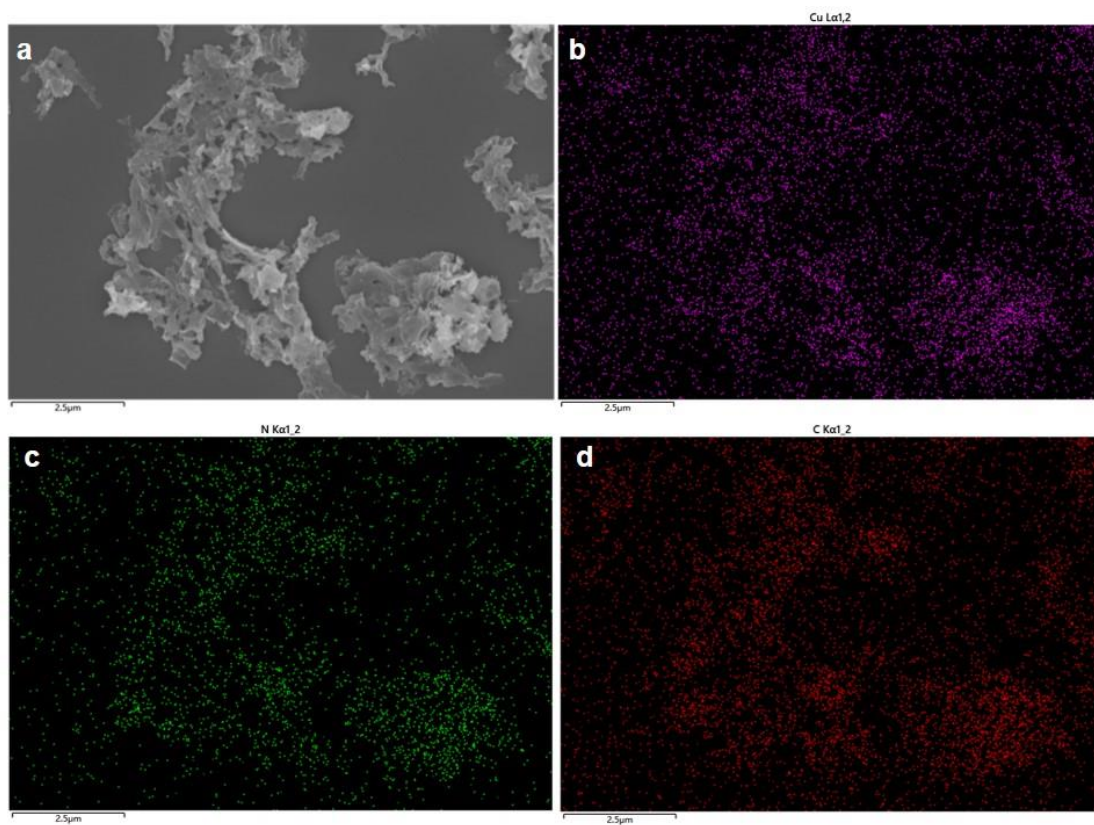

**Figure S5.** SEM image (a) and corresponding EDS mapping images (b-d) of g-C<sub>3</sub>N<sub>4</sub>-Im-Cu nanosheets.

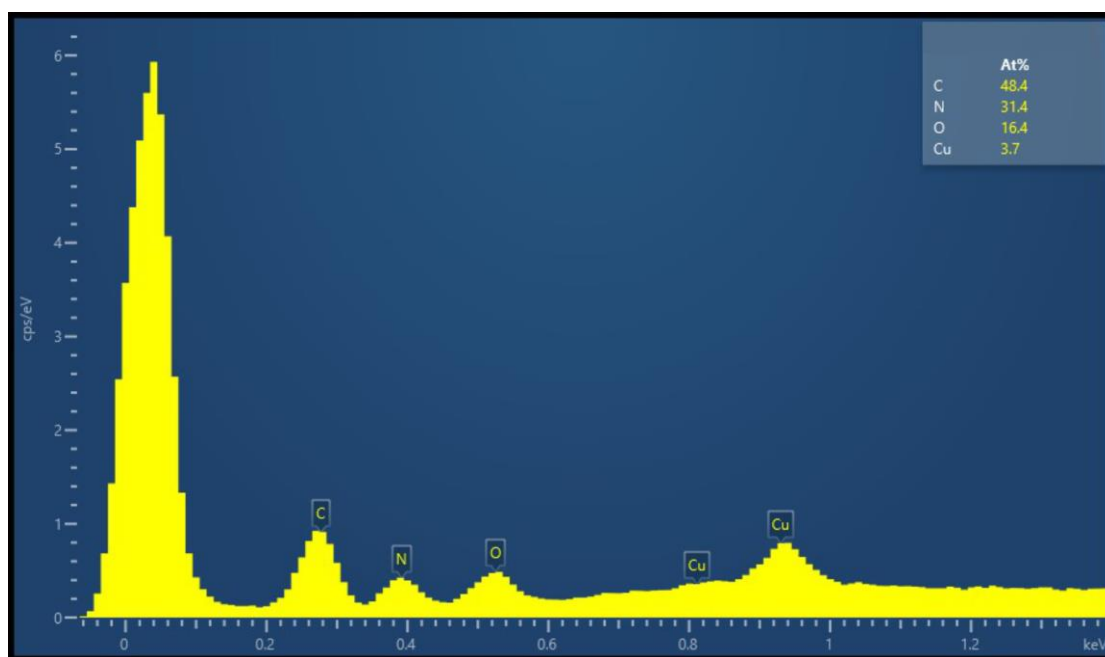

**Figure S6.** EDX spectrum of g-C<sub>3</sub>N<sub>4</sub>-Im-Cu nanosheets showing the content of C, N, Cu and O elements.

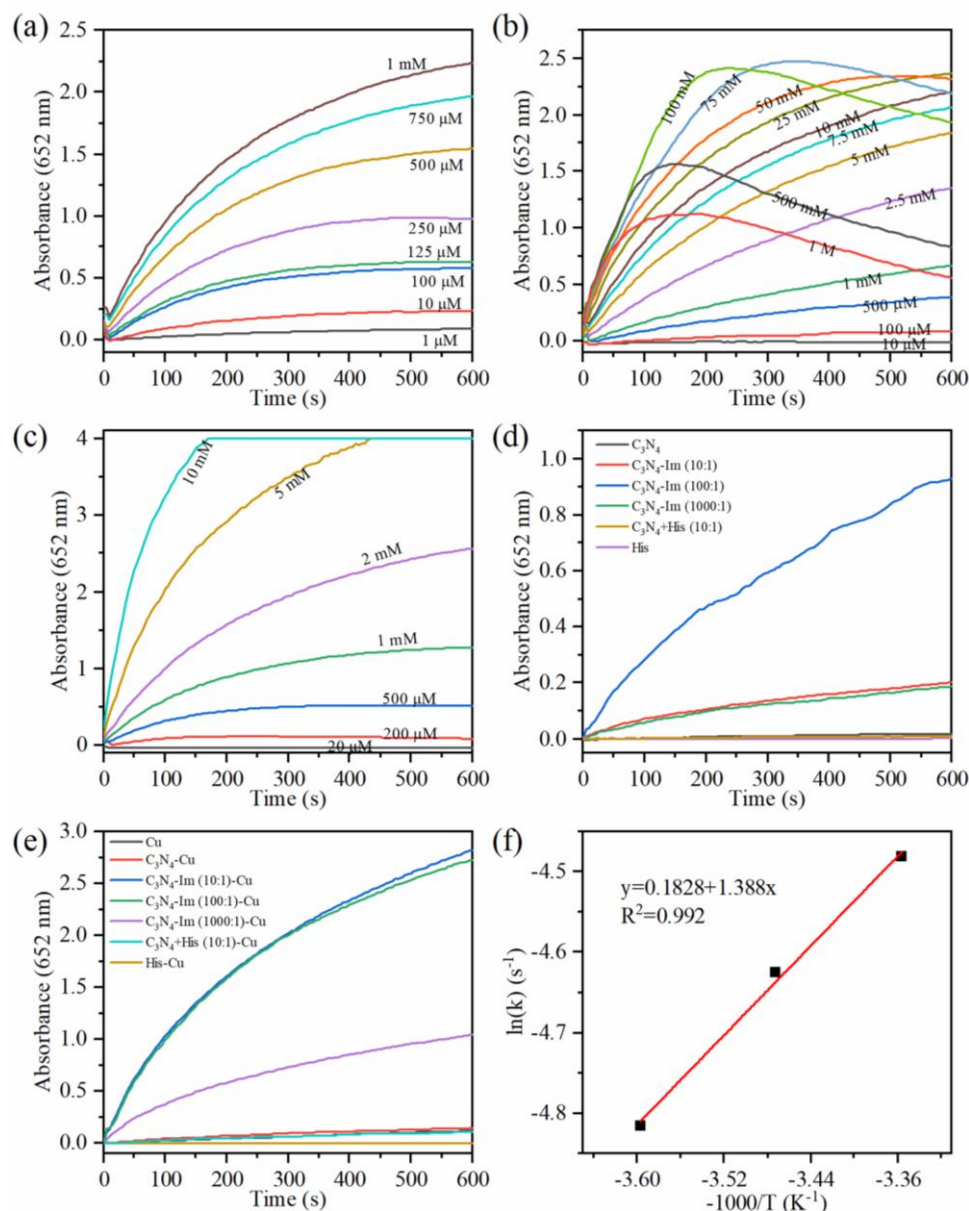

**Figure S7. Optimal reaction conditions for peroxidase-like activity of g-C<sub>3</sub>N<sub>4</sub>-Im-Cu.** The critical factors in the test of peroxidase-like activity of g-C<sub>3</sub>N<sub>4</sub>-Im-Cu were a) copper ion concentration, b) H<sub>2</sub>O<sub>2</sub> concentration and c) TMB concentration. d) The time-dependent absorbance changes at 652 nm of TMB solutions in the presence of histidine, g-C<sub>3</sub>N<sub>4</sub>, and g-C<sub>3</sub>N<sub>4</sub>-Im of different mass ratios between urea and histidine (10:1; 100:1; 1000:1). e) Repeating the experiment in **Figure S5d** after copper ions coordination. In the d) and e), The mixed solution contains H<sub>2</sub>O<sub>2</sub> 500 μl (100 mM), HAc/NaAc 1.5 ml (10 mM pH=7), catalyst 500 μL and TMB 500 μL (2 mM). f) The Arrhenius plot for H<sub>2</sub>O<sub>2</sub> oxidation catalyzed by g-C<sub>3</sub>N<sub>4</sub>-Im-Cu, the test curves were calculated at the selected temperatures of 5 °C, 15 °C and 25 °C.

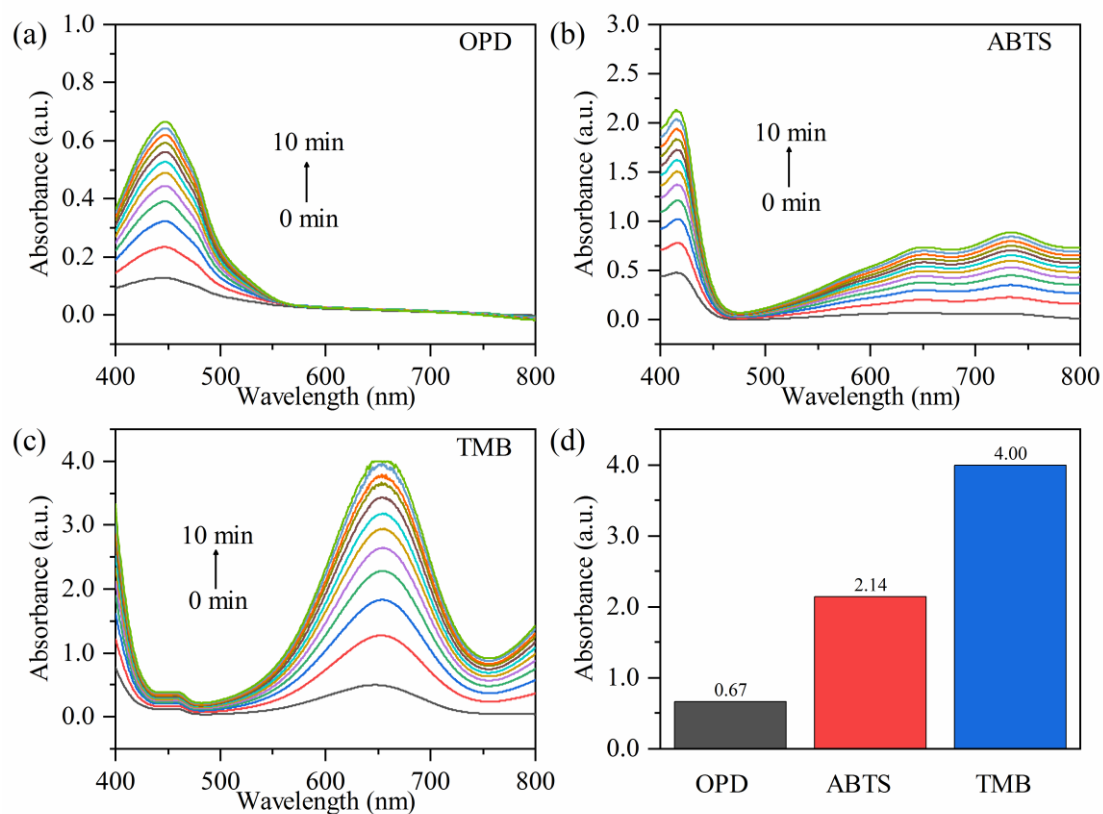

**Figure S8.** Peroxidase-like activity of g-C<sub>3</sub>N<sub>4</sub>-Im-Cu with various substrates. UV-vis spectra of H<sub>2</sub>O<sub>2</sub> and g-C<sub>3</sub>N<sub>4</sub>-Im-Cu mixture in the presence of a) OPD, b) ABTS and c) TMB. d) Absorbance value of the absorption peaks of the three peroxidase substrates. The mixture contains H<sub>2</sub>O<sub>2</sub> 500  $\mu$ l (100 mM), HAc/NaAc 1.5 ml (10mM pH=7), g-C<sub>3</sub>N<sub>4</sub>-Im-Cu 500  $\mu$ L (The concentrations of g-C<sub>3</sub>N<sub>4</sub>-Im and Cu(II) ion are 0.25 mg/ml and 1 mM respectively) and peroxidase substrates 500  $\mu$ L (2 mM).



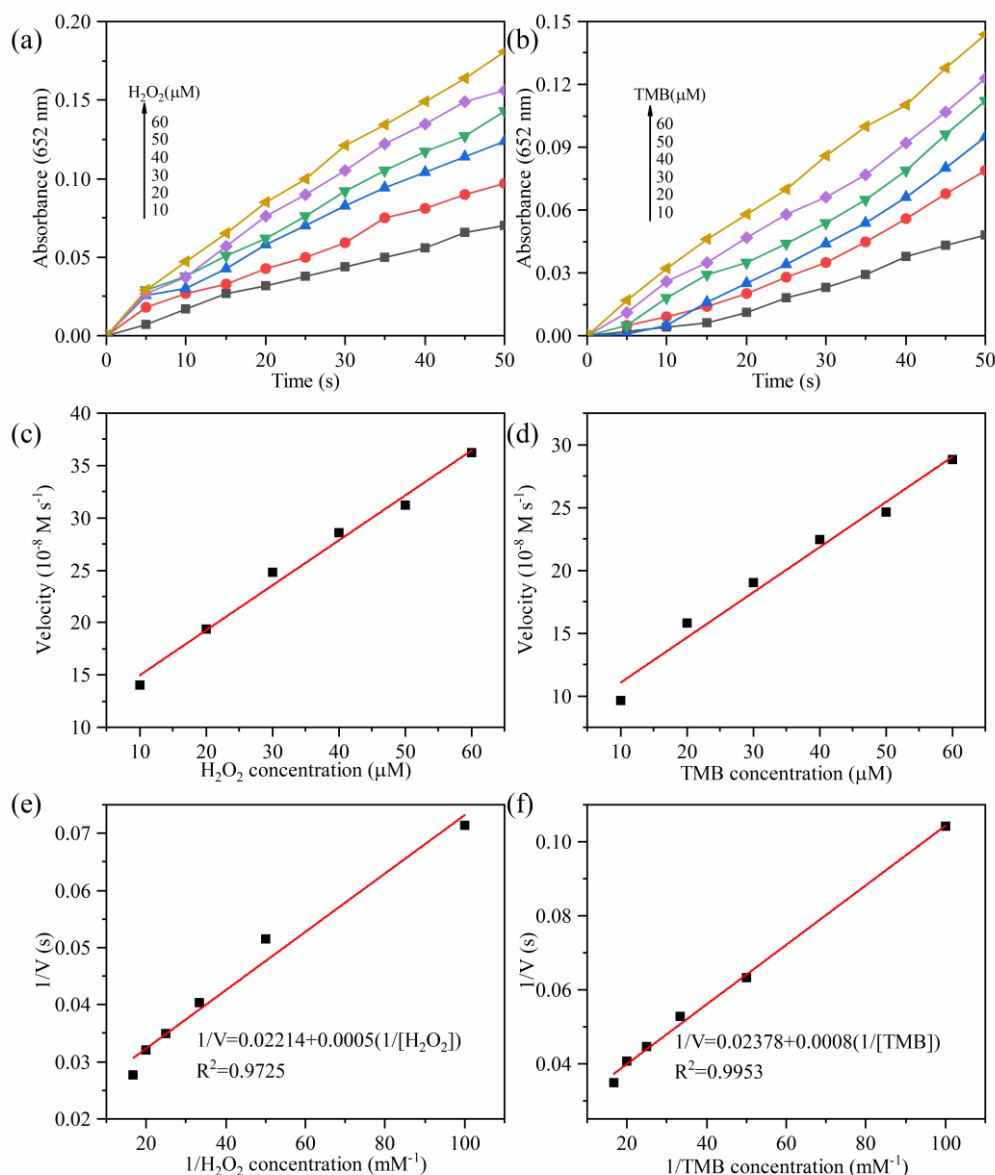

**Figure S9. Steady-state kinetic assay of peroxidase-like activity of g-C<sub>3</sub>N<sub>4</sub>-Im-Cu.** a-b) Time-dependent absorbance changes at 652 nm of TMB catalyzed by g-C<sub>3</sub>N<sub>4</sub>-Im-Cu in the presence of TMB or H<sub>2</sub>O<sub>2</sub> with different concentrations. c-d) The velocity (V) of the reaction changes in the presence of TMB or H<sub>2</sub>O<sub>2</sub> with different concentrations. e-f) Double reciprocal plots of activity of g-C<sub>3</sub>N<sub>4</sub>-Im-Cu in the presence of TMB or H<sub>2</sub>O<sub>2</sub> with different concentrations. Experiments were carried out in 10 mM acetic acid-sodium acetate buffer (pH=7) using g-C<sub>3</sub>N<sub>4</sub>-Im-Cu as catalyst at 15 °C. a, c, e) H<sub>2</sub>O<sub>2</sub> concentration was fixed at 100 mM and TMB concentration was varied. b, d, f) TMB concentration was fixed at 2 mM and H<sub>2</sub>O<sub>2</sub> concentration was varied.

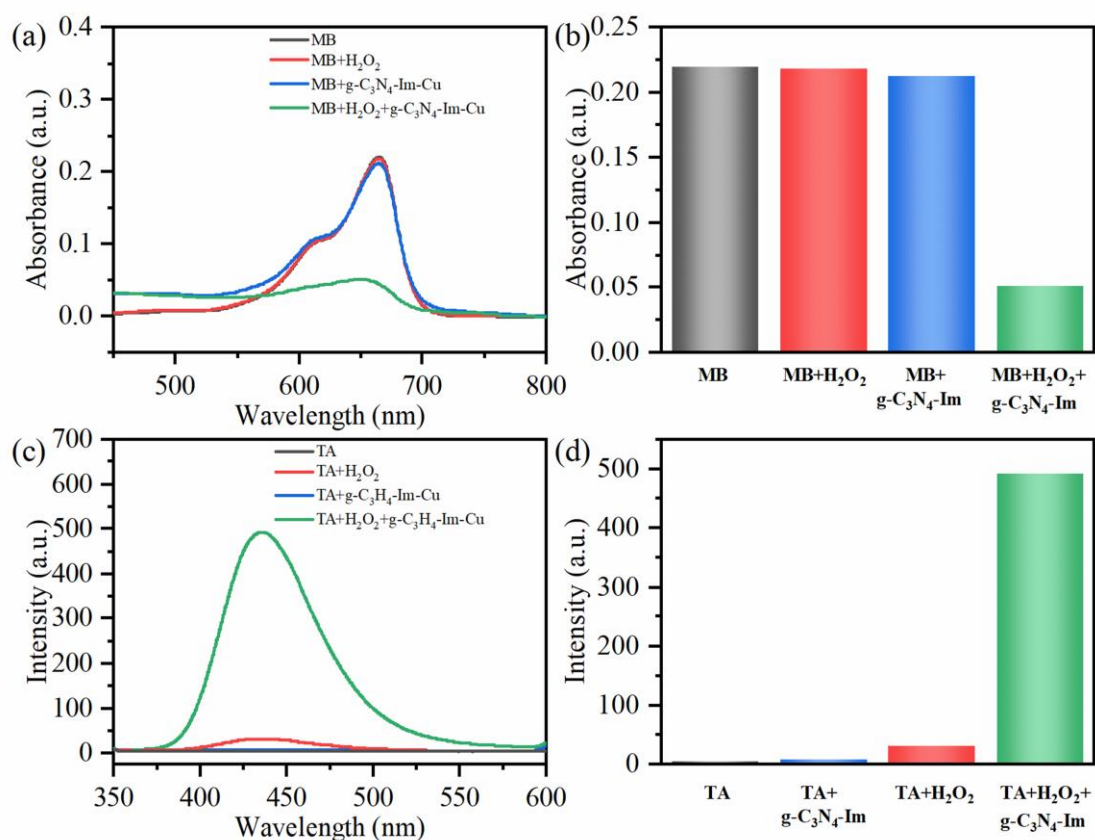

**Figure S10. Detecting hydroxyl radical ( $\bullet\text{OH}$ ) with UV-vis and fluorescence spectra.** a-b) UV-vis spectra of MB, MB + H<sub>2</sub>O<sub>2</sub>, MB + g-C<sub>3</sub>N<sub>4</sub>-Im-Cu, MB + g-C<sub>3</sub>N<sub>4</sub>-Im-Cu + H<sub>2</sub>O<sub>2</sub> after 0.5 h of reaction in acetic acid-sodium acetate buffer solution, respectively. The mixed solution contains H<sub>2</sub>O<sub>2</sub> 500  $\mu\text{l}$  (100 mM), HAc/NaAc 1.5 ml (10 mM, pH=7), g-C<sub>3</sub>N<sub>4</sub>-Im-Cu 500  $\mu\text{l}$  and MB 500  $\mu\text{l}$  (2 mM). c-d) Fluorescence spectra of acetic acid-sodium acetate buffer solution include TA, TA + H<sub>2</sub>O<sub>2</sub>, TA + g-C<sub>3</sub>N<sub>4</sub>-Im-Cu, TA + H<sub>2</sub>O<sub>2</sub> + g-C<sub>3</sub>N<sub>4</sub>-Im-Cu after 12 h reaction. The mixed solution contains H<sub>2</sub>O<sub>2</sub> 500  $\mu\text{l}$  (100 mM), HAc/NaAc 1.5 ml (10 mM, pH=7), g-C<sub>3</sub>N<sub>4</sub>-Im-Cu 500  $\mu\text{l}$  and TA 500  $\mu\text{l}$  (2 mM).

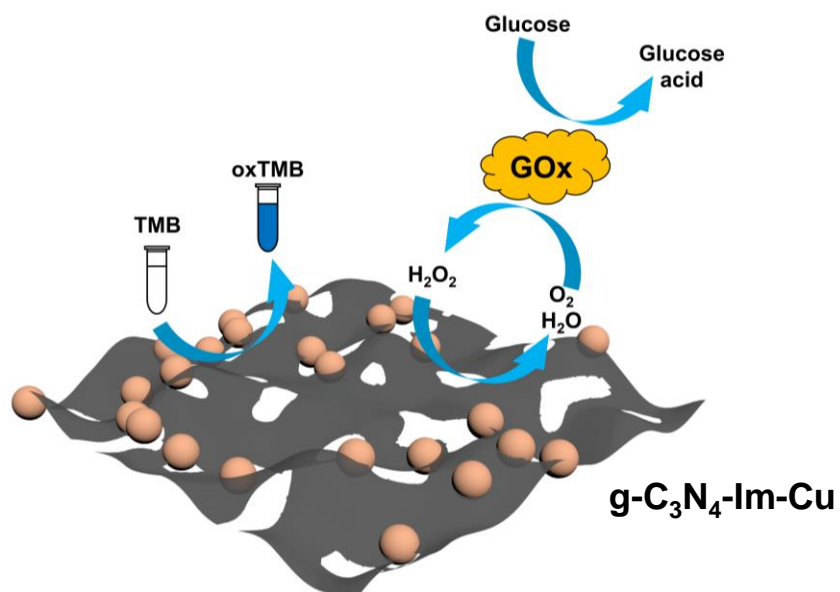

**Figure S11.** Schematic illustration of glucose detection with glucose oxidase (GOx) and g-C<sub>3</sub>N<sub>4</sub>-Im-Cu catalyzed reactions.

**Table S1.** Activation energy calculation results.

| T(K) | -1(K <sup>-1</sup> ) | k(s <sup>-1</sup> ) | Ea<br>(kJ•mol <sup>-1</sup> ) | A<br>(s <sup>-1</sup> ) |
|------|----------------------|---------------------|-------------------------------|-------------------------|
| 278  | -0.0036              | 0.0081              | 11.54                         | 1.2                     |
| 288  | -0.00347             | 0.0098              |                               |                         |
| 298  | -0.00336             | 0.01132             |                               |                         |

**Table S2.** Activation energy for H<sub>2</sub>O<sub>2</sub> oxidation catalyzed by different catalysts.

| Number | Sample                                 | Ea<br>(kJ•mol <sup>-1</sup> ) | Reference |
|--------|----------------------------------------|-------------------------------|-----------|
| 1      | ZrO <sub>2</sub>                       | 33±1                          | [s1]      |
| 2      | TiO <sub>2</sub>                       | 34±1                          | [s2]      |
| 3      | Y <sub>2</sub> O <sub>3</sub>          | 44±5                          | [s2]      |
| 4      | MoS <sub>2</sub> /GO                   | 24.64                         | [s3]      |
| 5      | GO                                     | 28.8                          | [s4]      |
| 6      | g-C <sub>3</sub> N <sub>4</sub> -Im-Cu | 11.54                         | This work |

**Table.S3.** Limit of detection (LOD) of various nanozymes for glucose.

| No. | Catalysts                                                                             | Limit of detection ( $\mu\text{M}$ ) | Reference |
|-----|---------------------------------------------------------------------------------------|--------------------------------------|-----------|
| 1   | $\text{Fe}_3\text{O}_4@\text{CeO}_2$                                                  | 21                                   | [s5]      |
| 2   | Corrole- $\text{Fe}_3\text{O}_4$ nanocomposites                                       | 2.46                                 | [s6]      |
| 3   | $\text{Fe}_3\text{O}_4$ NPs                                                           | 30                                   | [s7]      |
| 4   | Fe-porphyrin-based covalent organic framework (Fe-COF)                                | 1                                    | [s8]      |
| 5   | $\text{Co}_3\text{O}_4$                                                               | 0.32                                 | [s9]      |
| 6   | $\text{MoS}_2/\text{GO}$                                                              | 0.086                                | [s3]      |
| 7   | $\text{MoS}_2@\text{MgFe}_2\text{O}_4$                                                | 2                                    | [s10]     |
| 8   | $\text{MoO}_3/\text{C}$                                                               | 10                                   | [s11]     |
| 9   | $\text{VS}_2$                                                                         | 1.5                                  | [s12]     |
| 10  | $\text{MnO}_2$ NFs                                                                    | 5                                    | [s13]     |
| 11  | GOD-GO/ $\text{MnO}_2$                                                                | 17                                   | [s14]     |
| 12  | Carbon quantum dots (CQDs)                                                            | 3                                    | [s15]     |
| 13  | $\text{GOx}@\text{ZIF-8}@\text{Fe-PDA}$                                               | 1.1                                  | [s16]     |
| 14  | $\text{MnO}_2$                                                                        | 10                                   | [s17]     |
| 15  | NiFe-LDHNS                                                                            | 50                                   | [s18]     |
| 16  | multielement-doped carbon dots (ME-CDs)                                               | 60                                   | [s19]     |
| 17  | CoO-OMC nanocomposite                                                                 | 68                                   | [s20]     |
| 18  | $\text{Fe}_3\text{O}_4@\text{SiO}_2\text{-NH}_2\text{-Au}@\text{Pd}_{0.30}\text{NPs}$ | 0.06                                 | [s21]     |
| 19  | rhodium nanoparticles (RhNPs)                                                         | 0.75                                 | [s22]     |
| 20  | Ag@Au core/shell triangular nanoplates                                                | 800                                  | [s23]     |

|    |                                        |      |           |
|----|----------------------------------------|------|-----------|
| 21 | Au-Ni/g-C <sub>3</sub> N <sub>4</sub>  | 1.7  | [s24]     |
| 22 | AgNPs/GQDs                             | 0.03 | [s25]     |
| 23 | PtAg-multi-walled carbon nanotubes     | 600  | [s26]     |
| 24 | g-C <sub>3</sub> N <sub>4</sub>        | 0.4  | [s27]     |
| 25 | Fe-g-C <sub>3</sub> N <sub>4</sub>     | 0.5  | [s28]     |
| 26 | Cu NPs/g-C <sub>3</sub> N <sub>4</sub> | 0.37 | [s29]     |
| 27 | PdNPs/g-C <sub>3</sub> N <sub>4</sub>  | 0.4  | [s30]     |
| 28 | g-C <sub>3</sub> N <sub>4</sub> -PdNPs | 1    | [s31]     |
| 29 | Ru-C <sub>3</sub> N <sub>4</sub>       | 0.1  | [s32]     |
| 30 | MnSe-g-C <sub>3</sub> N <sub>4</sub>   | 8    | [s33]     |
| 31 | CuPd@H-C <sub>3</sub> N <sub>4</sub>   | 0.1  | [s34]     |
| 32 | g-C <sub>3</sub> N <sub>4</sub> -Im-Cu | 0.01 | This work |

---

## Reference

- [s1] Lousada, C. M.; Jonsson, M. Kinetics, mechanism, and activation energy of  $\text{H}_2\text{O}_2$  decomposition on the surface of  $\text{ZrO}_2$ . *J. Phys. Chem. C* **2010**, *114* (25), 11202-11208.
- [s2] Lousada, C. M.; Johansson, A. J.; Brinck, T.; Jonsson, M. Mechanism of  $\text{H}_2\text{O}_2$  decomposition on transition metal oxide surfaces. *J. Phys. Chem. C* **2012**, *116* (17), 9533-9543.
- [s3] Peng, J.; Weng, J. Enhanced peroxidase-like activity of  $\text{MoS}_2$ /graphene oxide hybrid with light irradiation for glucose detection. *Biosens. Bioelectron.* **2017**, *89*, 652-658.
- [s4] Wang, Z.; Lv, X.; Weng, J. High peroxidase catalytic activity of exfoliated few-layer graphene. *Carbon* **2013**, *62*, 51-60.
- [s5] Huang, F.; Wang, J.; Chen, W.; Wan, Y.; Wang, X.; Cai, N.; Liu, J.; Yu, F. Synergistic peroxidase-like activity of  $\text{CeO}_2$ -coated hollow  $\text{Fe}_3\text{O}_4$  nanocomposites as an enzymatic mimic for low detection limit of glucose. *Journal of the Taiwan Institute of Chemical Engineers* **2018**, *83*, 40-49.
- [s6] Gao, L.; Zhang, L.; Lyu, X.; Lu, G.; Liu, Q. Corrole functionalized iron oxide nanocomposites as enhanced peroxidase mimic and their application in  $\text{H}_2\text{O}_2$  and glucose colorimetric sensing. *Engineered Science* **2018**, *1* (14), 69-77.
- [s7] Chen, M.; Sun, L.; Ding, Y.; Shi, Z.; Liu, Q. N, N'-Di-carboxymethyl perylene diimide functionalized magnetic nanocomposites with enhanced peroxidase-like activity for colorimetric sensing of  $\text{H}_2\text{O}_2$  and glucose. *New J. Chem* **2017**, *41* (13), 5853-5862.
- [s8] Wang, J.; Yang, X.; Wei, T.; Bao, J.; Zhu, Q.; Dai, Z. Fe-Porphyrin-based covalent organic framework as a novel peroxidase mimic for a one-pot glucose colorimetric assay. *ACS Appl. Bio Mater.* **2018**, *1* (2), 382-388.
- [s9] Lu, J.; Zhang, H.; Li, S.; Guo, S.; Shen, L.; Zhou, T.; Zhong, H.; Wu, L.; Meng, Q.; Zhang, Y. Oxygen-vacancy-enhanced peroxidase-like activity of reduced  $\text{Co}_3\text{O}_4$  nanocomposites for the colorimetric detection of  $\text{H}_2\text{O}_2$  and glucose. *Inorg. Chem.* **2020**, *59* (5), 3152-3159.
- [s10] Zhang, Y.; Zhou, Z.; Wen, F.; Tan, J.; Peng, T.; Luo, B.; Wang, H.; Yin, S. A flower-like  $\text{MoS}_2$ -decorated  $\text{MgFe}_2\text{O}_4$  nanocomposite: Mimicking peroxidase and colorimetric detection of  $\text{H}_2\text{O}_2$  and glucose. *Sens. Actuators B Chem.* **2018**, *275*, 155-162.
- [s11] Ren, H.; Yan, L.; Liu, M.; Wang, Y.; Liu, X.; Liu, C.; Liu, K.; Zeng, L.; Liu, A. Green tide biomass templated synthesis of molybdenum oxide nanorods supported on carbon as efficient nanozyme for sensitive glucose

- colorimetric assay. *Sens. Actuators B Chem.* **2019**, 296, 126517.
- [s12] Huang, L.; Zhu, W.; Zhang, W.; Chen, K.; Wang, J.; Wang, R.; Yang, Q.; Hu, N.; Suo, Y.; Wang, J. Layered vanadium (IV) disulfide nanosheets as a peroxidase-like nanozyme for colorimetric detection of glucose. *Microchimica Acta* **2018**, 185 (1), 1-8.
- [s13] Han, L.; Zhang, H.; Chen, D.; Li, F. Protein-directed metal oxide nanoflakes with tandem enzyme-like characteristics: colorimetric glucose sensing based on one-pot enzyme-free cascade catalysis. *Adv. Funct. Mater.* **2018**, 28 (17), 1800018.
- [s14] Lee, P.-C.; Li, N.-S.; Hsu, Y.-P.; Peng, C.; Yang, H.-W. Direct glucose detection in whole blood by colorimetric assay based on glucose oxidase-conjugated graphene oxide/MnO<sub>2</sub> nanozymes. *Analyst* **2019**, 144 (9), 3038-3044.
- [s15] Zhong, Q.; Chen, Y.; Qin, X.; Wang, Y.; Yuan, C.; Xu, Y. Colorimetric enzymatic determination of glucose based on etching of gold nanorods by iodine and using carbon quantum dots as peroxidase mimics. *Microchimica Acta* **2019**, 186 (3), 161.
- [s16] Zhao, Z.; Lin, T.; Liu, W.; Hou, L.; Ye, F.; Zhao, S. Colorimetric detection of blood glucose based on GO<sub>x</sub>@ZIF-8@Fe-polydopamine cascade reaction. *Spectrochim. Acta A Mol. Biomol.* **2019**, 219, 240-247.
- [s17] Zhang, J.; Dai, X.; Song, Z.-L.; Han, R.; Ma, L.; Fan, G.-C.; Luo, X. One-pot enzyme-and indicator-free colorimetric sensing of glucose based on MnO<sub>2</sub> nano-oxidizer. *Sens. Actuators B Chem.* **2020**, 304, 127304.
- [s18] Zhan, T.; Kang, J.; Li, X.; Pan, L.; Li, G.; Hou, W. NiFe layered double hydroxide nanosheets as an efficiently mimic enzyme for colorimetric determination of glucose and H<sub>2</sub>O<sub>2</sub>. *Sens. Actuators B Chem.* **2018**, 255, 2635-2642.
- [s19] Wang, B.; Liu, F.; Wu, Y.; Chen, Y.; Weng, B.; Li, C. M. Synthesis of catalytically active multielement-doped carbon dots and application for colorimetric detection of glucose. *Sens. Actuators B Chem.* **2018**, 255, 2601-2607.
- [s20] Guo, Y.; Yan, L.; Zhang, R.; Ren, H.; Liu, A. CoO-supported ordered mesoporous carbon nanocomposite based nanozyme with peroxidase-like activity for colorimetric detection of glucose. *Process Biochem* **2019**, 81, 92-98.
- [s21] Adeniyi, O.; Sicwetsha, S.; Mashazi, P. Nanomagnet-silica nanoparticles decorated with Au@Pd for enhanced peroxidase-like activity and colorimetric glucose sensing. *ACS Appl. Mater. Interfaces* **2019**, 12 (2), 1973-1987.
- [s22] Choleva, T. G.; Gatselou, V. A.; Tsogas, G. Z.; Giokas, D. L. Intrinsic peroxidase-like activity of rhodium nanoparticles, and their application to the colorimetric determination of hydrogen peroxide and glucose. *Microchimica Acta* **2018**, 185 (1), 1-9.



- [s23] Liu, A.; Li, M.; Wang, J.; Feng, F.; Zhang, Y.; Qiu, Z.; Chen, Y.; Meteku, B. E.; Wen, C.; Yan, Z. Ag@Au core/shell triangular nanoplates with dual enzyme-like properties for the colorimetric sensing of glucose. *Chin Chem Lett* **2020**, 31 (5), 1133-1136.
- [s24] Darabdhara, G.; Bordoloi, J.; Manna, P.; Das, M. R. Biocompatible bimetallic Au-Ni doped graphitic carbon nitride sheets: a novel peroxidase-mimicking artificial enzyme for rapid and highly sensitive colorimetric detection of glucose. *Sens. Actuators B Chem* **2019**, 285, 277-290.
- [s25] Nguyen, N. D.; Van Nguyen, T.; Chu, A. D.; Tran, H. V.; Tran, L. T.; Huynh, C. D. A label-free colorimetric sensor based on silver nanoparticles directed to hydrogen peroxide and glucose. *Arab. J. Chem.* **2018**, 11 (7), 1134-1143.
- [s26] Fu, S.; Zhu, C.; Song, J.; Engelhard, M.; Xia, H.; Du, D.; Lin, Y. PdCuPt nanocrystals with multibranches for enzyme-free glucose detection. *ACS Appl. Mater. Interfaces* **2016**, 8 (34), 22196-22200.
- [s27] Liu, J.-W.; Luo, Y.; Wang, Y.-M.; Duan, L.-Y.; Jiang, J.-H.; Yu, R.-Q. Graphitic carbon nitride nanosheets-based ratiometric fluorescent probe for highly sensitive detection of H<sub>2</sub>O<sub>2</sub> and glucose. *ACS Appl. Mater. Interfaces* **2016**, 8 (49), 33439-33445.
- [s28] Peng, Y.; Yu, X.; Yin, W.; Dong, W.; Peng, J.; Wang, T. Colorimetric assay using mesoporous Fe-doped graphitic carbon nitride as a peroxidase mimetic for the determination of hydrogen peroxide and glucose. *ACS Appl. Bio Mater.* **2019**, 3 (1), 59-67. DOI: 10.1021/acsabm.9b00883
- [s29] Wang, N.; Han, Z.; Fan, H.; Ai, S. Copper nanoparticles modified graphitic carbon nitride nanosheets as a peroxidase mimetic for glucose detection. *RSC Adv.* **2015**, 5 (111), 91302-91307.
- [s30] Zhang, W.; Li, X.; Xu, X.; He, Y.; Qiu, F.; Pan, J.; Niu, X. Pd nanoparticle-decorated graphitic C<sub>3</sub>N<sub>4</sub> nanosheets with bifunctional peroxidase mimicking and ON-OFF fluorescence enable naked-eye and fluorescent dual-readout sensing of glucose. *J Mater Chem B* **2019**, 7 (2), 233-239.
- [s31] Jin, X.; Zhong, Y.; Chen, L.; Xu, L.; Wu, Y.; Fu, F. A Palladium-Doped Graphitic Carbon Nitride Nanosheet with High Peroxidase-Like Activity: Preparation, Characterization, and Application in Glucose Detection. *Part Part Syst Charact* **2018**, 35 (3), 1700359.
- [s32] Deng, W.; Peng, Y.; Yang, H.; Tan, Y.; Ma, M.; Xie, Q.; Chen, S. Ruthenium ion-complexed carbon nitride nanosheets with peroxidase-like activity as a ratiometric fluorescence probe for the detection of hydrogen peroxide and glucose. *ACS Appl. Mater. Interfaces* **2019**, 11 (32), 29072-29077.
- [s33] Qiao, F.; Qi, Q.; Wang, Z.; Xu, K.; Ai, S. MnSe-loaded g-C<sub>3</sub>N<sub>4</sub> nanocomposite with synergistic peroxidase-like catalysis: synthesis and application toward colorimetric biosensing of H<sub>2</sub>O<sub>2</sub> and glucose. *Sens. Actuators B Chem.* **2016**, 229, 379-386.

- [s34] Tang, W.; An, Y.; Chen, J.; Row, K. H. Multienzyme mimetic activities of holey CuPd@H-C<sub>3</sub>N<sub>4</sub> for visual colorimetric and ultrasensitive fluorometric discriminative detection of glutathione and glucose in physiological fluids. *Talanta* **2022**, 123221.
